# Supplementary material
Source: MDPI journal article supplement (https://www.mdpi.com/2311-7524/9/6/636)
Supplement: s1 [file s1]

**Table S2.** Metabolites identified from *Solanum lycopersicum* leaf extracts using  $^1\text{H}$ -NMR ( $\text{D}_2\text{O}/\text{MeOH}$  [1:1], 600 MHz).

| Metabolites                 | Chemical shift $\delta$ , ppm                                                                  |
|-----------------------------|------------------------------------------------------------------------------------------------|
|                             | $^1\text{H}$ (multiplicity, coupling constant $J$ )                                            |
| Aspartate                   | 2.61 (dd, $J = 16.1, 7.4$ Hz)<br>2.80 (dd, $J = 16.1, 4.5$ Hz)<br>3.85 (dd, $J = 9.9, 3.3$ Hz) |
| $\gamma$ -aminobutyric acid | 1.92 (p, $J = 7.5$ Hz)<br>2.40 (t, $J = 7.5$ Hz)<br>3.01 (t, $J = 7.5$ Hz)                     |
| $\alpha$ -Glucose           | 5.18 (d, $J = 3.8$ Hz)                                                                         |
| $\beta$ -Glucose            | 4.57 (d, $J = 7.9$ Hz)                                                                         |
| Glycine                     | 3.54 (s)                                                                                       |
| Proline                     | 1.97 (m)<br>2.01 (m)<br>2.06 (m)<br>2.32 (m)                                                   |
| Valine                      | 1.00 (d, $J = 6.9$ Hz)<br>1.05 (d, $J = 6.9$ Hz)                                               |
